# Supplementary material for: Development of an hydrophobic fluoro-silica surface for studying homotypic cancer cell aggregation–disaggregation as a single dynamic process in vitro
Source: Royal Society of Chemistry journal article supplement (doi:10.1039/c4bm00194j), 2014-01-01
Supplement: c4bm00194j9.pdf [file c4bm00194j9.pdf]

### **Video Captions**

**Video Title 1:** Live imaging of MCF-7 cells undergoing aggregation-disaggregation upon the fluoro-silica surface (total culture time 46 h, X100 magnification, scale bar represents 100  $\mu$ M).

**Video Title 2:** Live imaging of MCF-7 culturing upon standard tissue culture polystyrene (total culture time 46 h, X100 magnification, scale bar represents 100  $\mu$ M).

**Video Title 3:** Live imaging of MCF-10a culturing upon the fluoro-silica surface in serum free media (S-) (total culture time 46 h, X100 magnification, scale bar represents 100  $\mu$ M).

**Video Title 4:** Live imaging of MCF-10a culturing upon standard tissue culture polystyrene in serum free media (S-) (total culture time 46 h, X100 magnification, scale bar represents 100  $\mu$ M).

**Video Title 5:** Live imaging of MCF-10a undergoing aggregation-disaggregation upon the fluoro-silica surface in serum supplemented media (S+) (total culture time 46 h, X100 magnification, scale bar represents 100  $\mu$ M).

**Video Title 6:** Live imaging of MCF-10a culturing upon standard tissue culture polystyrene in serum supplemented media (S+) (total culture time 46 h, X100 magnification, scale bar represents 100  $\mu$ M).

**Video Legend:** The fluoro-silica surface developed and characterised within this study has been shown to induce transient, serum dependent aggregation of breast cancer cells, facilitating the study of cancer cell aggregation-disaggregation events without the disturbance of surface passaging.

**Key Words:** Anoikis resistance; Surface chemistry; Cell motility; Homotypic aggregation; Spheroid formation.
