# Supplementary figures and images for: Development of an hydrophobic fluoro-silica surface for studying homotypic cancer cell aggregation–disaggregation as a single dynamic process in vitro
Source: Royal Society of Chemistry journal article supplement (doi:10.1039/c4bm00194j), 2014-01-01

**TCP**

**FS Surface**

**MCF-7**

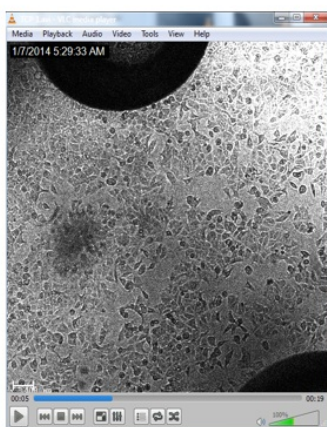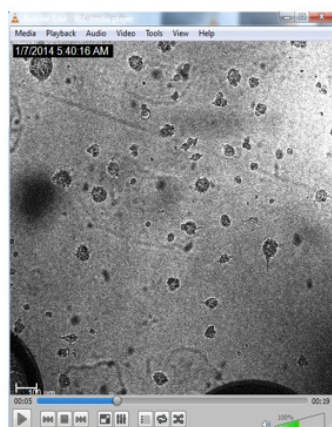

**MCF-10a S+**

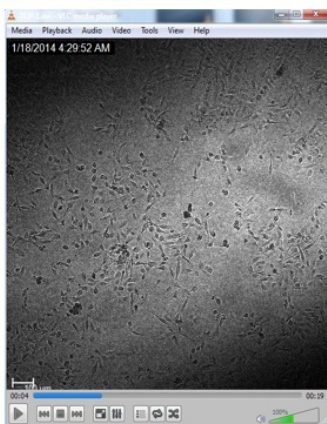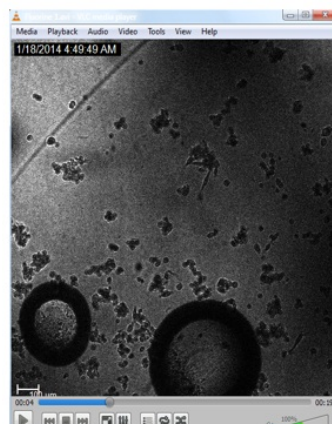

**MCF-10a S-**

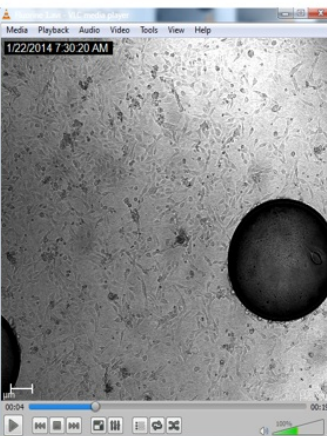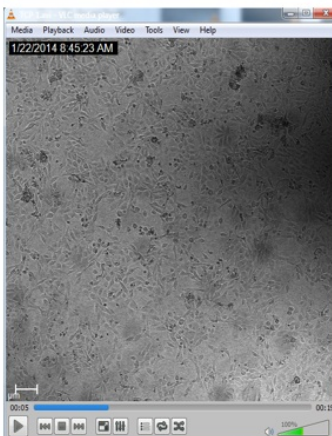

Supplement: c4bm00194j8.pdf [file c4bm00194j8.pdf]
